# Supplementary material
Source: PubMed Central journal article supplement (PMC9845309)
Supplement: 41598_2023_27951_MOESM1_ESM.pdf [file 41598_2023_27951_MOESM1_ESM.pdf]

# Using Survey Data to Estimate the Impact of the Omicron Variant on Vaccine Efficacy against COVID-19 Infection (Supplementary Information)

Jesús Rufino, Carlos Baquero, Davide Frey, Christin A. Glorioso, Antonio Ortega, Nina Reščič, Julian Charles Roberts, Rosa E. Lillo, Raquel Menezes, Jaya Prakash Champati, and Antonio Fernández Anta

## A Curating of Responses

In this work, we use the responses to the UMD Global CTIS, to which we have access by agreement with UMD and Facebook (see Section 2.4). We first curate the data by removing abnormal responses, following the approach proposed by Alvarez et al. [29]: We remove responses that declare to have all symptoms or that declare unusual values (greater than 100) in the quantitative questions of the survey (e.g., days of symptom duration, number of symptomatic contacts, number of people staying at the same place, etc.).

## B Machine Learning Classifier: Random Forest

### B.1 Ground-truth Set

After curating the responses, the next task we face is determining whether they correspond to active cases of COVID-19. This is somewhat direct for the subset of responses that respond affirmatively to the survey question “B7: Have you been tested for COVID-19 in the past 14 days?” and then respond positively or negatively to the survey question “B8a: Did your most recent test find that you had COVID-19?” [28]. For this work, we assume that a participant responding affirmatively to both questions is an active case of COVID-19 (i.e., it is a *positive* case). Similarly, a participant responding affirmatively to Question B7 and negatively to Question B8a is assumed not infected with COVID-19 (i.e., *negative*). This set of classified responses constitute a *ground-truth set*, for which infection status (positive or negative) is available.

Unfortunately, this ground-truth set cannot be used directly to estimate the prevalence of COVID-19 in the overall population, because the set is usually very small and is not produced via uniform random sampling: People who have reason to believe they may be infected are more likely to be tested and therefore the ratio of positives among those tested in the latest 14 days (i.e., the *testing positive rate*, abbreviated TPR) is higher than the actual prevalence.

### B.2 Creating the Machine Learning Classifier: Random Forest

Each response to the survey includes a large number of questions (obviously, not all participants answer all questions). For training and inference of the Random Forest classifier, we use only questions with answers holding discrete values. From these we remove questions B7 and B8, which are only used to create the ground-truth set, as well as related questions, such as “B0: As far as you know, have you ever had coronavirus (COVID-19)?” and “B15: Do any of the following reasons describe why you were tested for COVID-19 in the past 14 days?”. Finally, we do not use the questions related to vaccination, since we do not want them to influence the classification. The set of questions used can be found in Appendix D. The answers to this set of questions are “dummified” before they are used, i.e., a question with  $k$  possible answers is replaced by  $k$  binary attributes. The Random Forest model is generated with the `randomForest` function in R. No hyperparameter tuning is done, and the standard options of the function are used, with the exception of limiting the model to 100 trees to reduce the training time.

Observe that the questions in Appendix D include all symptoms, but also have many more questions, including behavioral or demographic aspects. Additionally, the Random Forest classifier can give different weights to different symptoms, while previously proposed symptom based criteria are based on determining only whether a symptom is present or not. Thus, overall the Random Forest classifier is much more versatile than the symptom-based criteria described in the previous section. Additionally, there are other aspects that make the Random Forest classifier(s) more adaptive:

- Firstly, we create different models for different countries. It is expected that different countries will have local characteristics, thus training a different classifier for each country can capture them.
- Secondly, we create not one but several models per country: one for each 3-month period. This allows the model to capture and adapt to aspects that change over time, like the level of vaccination, the surge of new variants, or the stringency of measures imposed.

### B.3 Evaluating the Classifiers

In order to verify whether the Random Forest classifier provides better proxy estimates than the symptoms-based classifiers, we selected a set of countries and tested the performance of each classifier in the last two quarters of 2021. To this end, we randomly divided the ground-truth set into a training and a testing set, with 70% and 30% of the responses of the ground-truth set in each subset, respectively. eTable 9 shows the results for three countries that have detected Omicron in December for the periods of July-September 2021 (2021-Q3) and of October-December 2021 (2021-Q4). The classification performance metrics used are:

- Accuracy: Ratio of cases correctly classified over the size of the test set.
- Sensitivity / recall: Ratio of cases correctly classified as positive over the number of positive cases.
- Specificity: Ratio of cases correctly classified as negative over the number of negative cases.
- F-score: Harmonic mean of precision and recall, where the precision is the ratio of cases correctly classified as positive over the number of all cases classified as positive.

As can be seen in eTable 9, **Random Forest** almost always shows the highest performance (marked in bold) among the classification methods used.

As another test, we then selected a set of countries that includes South Africa, along with the 20 countries that have the largest number of available responses in the UMD Global CTIS dataset. For each of these countries, the first two columns of eTable 10 show the official Test Positivity Rates obtained via *Our World In Data* [32, 36] (OWID TPR) and the corresponding survey-based estimate from the UMD Global CTIS dataset (CTIS TPR). The remaining columns show the Pearson correlation coefficient between the time series of Confirmed active cases (computed based on data from Johns Hopkins University [38] as described by Alvarez et al. [29]) and that of each of the candidate proxies in the period June 18th, 2021 (start of the first period considered in [16]), to December 31st, 2021. All time series have one value per day, which is the average of the latest 14 days.

We can make two observations from eTable 10. First, among all candidate proxies considered, **Random Forest** achieves at least 0.9 correlation for the largest number of countries. Second, 17 out of the 21 countries exhibit low TPR ( $\leq 0.1$ ) values in at least one of the first two columns (either official or survey-based TPR), and 11 out of the 21 exhibit low values in both columns, with 7 having values no higher than 0.05 (the WHO considers countries to have the epidemic under control when their TPR is below 0.05 [34]). This suggests that such countries keep the case count under control and report more accurate official data on confirmed cases. We can thus interpret the higher correlation between the **Random Forest** proxy and the Confirmed time series for the countries with low TPR as a sign that this proxy constitutes the most promising option among the five proxies considered, and thus will also be more accurate for countries for which the official data will be less reliable.

## C List of Symptoms

In the UMD Global CTIS the following question is asked: “B1 In the last 24 hours, have you had any of the following?” [28]. The following is the list of possible answers (non exclusive):

- Fever (B1.1).
- Cough (B1.2).
- Difficulty breathing (B1.3).
- Fatigue (B1.4).
- Stuffy or runny nose (B1.5).
- Aches or muscle pain (B1.6).
- Sore throat (B1.7).
- Chest pain (B1.8).
- Nausea (B1.9).
- Loss of smell or taste (B1.10).
- Headache (B1.12).
- Chills (B1.13).

## D Questions Used for the Machine Learning Model

The following is the list of survey questions whose answers are used to create the Random Forest models, and to classify with them the responses: B1\_1, B1\_2, B1\_3, B1\_4, B1\_5, B1\_6, B1\_7, B1\_8, B1\_9, B1\_10, B1\_11, B1\_12, B1\_13, B1\_14, B1b\_x1, B1b\_x2, B1b\_x3, B1b\_x4, B1b\_x5, B1b\_x6, B1b\_x7, B1b\_x8, B1b\_x9, B1b\_x10, B1b\_x11, B1b\_x12, B1b\_x13, B1b\_x14, B3, B5, B6, B9, B10, B11, B12\_1, B12\_2, B12\_3, B12\_4, B12\_5, B12\_6, B13\_1, B13\_2, B13\_3, B13\_4, B13\_5, B13\_6, B13\_7, B14\_1, B14\_2, B14\_3, B14\_4, B14\_5, C0\_1, C0\_2, C0\_3, C0\_4, C0\_5, C0\_6, C1\_m, C2, C3, C5, C6, C7, C8, C9, C9a, C12, C13\_1, C13\_2, C13\_3, C13\_4, C13\_5, C13\_6, C14, D1, D2, D3, D4, D5, D6\_1, D6\_2, D6\_3, D7, D8, D9, D10, E2, E3, E4, E7, H1, H2, H3.

The questions removed are B0, B7, B8, B15, and all the questions related to vaccination (V-questions).

## E Vaccination in South Africa

Figure 1 shows an area plot, estimated from the UMD Global CTIS data, of the proportion of vaccinated with 1 dose, Vaccinated with 2 doses, and Unvaccinated from June 18th until December 31st, 2021. As can be seen, the ratio of the population vaccinated is low at the beginning of this interval, especially with two doses. Then, we can see a high increase in Vaccinated between July and October. We point out that in each time point of this plot the proportions are provided by a different set of surveys respondents, and it still closely captures the increase of vaccination.

Table 1 shows the distribution of doses used and population vaccinated with the two types of vaccines delivered in South Africa: Johnson&Johnson and Pfizer/BioNTech. Some columns are inferred from the available data: total doses, people vaccinated, and people fully vaccinated. The dates shown are the closest available to the start and end of the intervals considered. This data has been obtained from Our World in Data [36]. In the same table, the rightmost columns present the percentage of responses to the UMD CTIS survey that report having received one or two doses of vaccination. As can be seen, these percentages are higher than the actual values (roughly for times higher in all dates for two doses) which hints that the respondents to the UMD CTIS survey are not a uniform sample of the population of South Africa.

## F Countries with Omicron Prevalence

Table 3 shows basic official vaccination data on December 31st, 2021, of these countries. Table 4 shows the vaccine types delivered in these countries by the end of 2021. This data has been obtained from Our World in Data [32, 35, 36].

Tables 2 and 3 show the COVID-19 prevalence and the vaccine efficacy in October and December in the countries with presence of Omicron as defined in Section 2.3.2. When data is insufficient to meet the defined selection criteria, it is omitted and replaced by “-”. Both tables are presented alphabetically by country name and also share a column depicting the most recent data on Omicron prevalence among all virus samples.

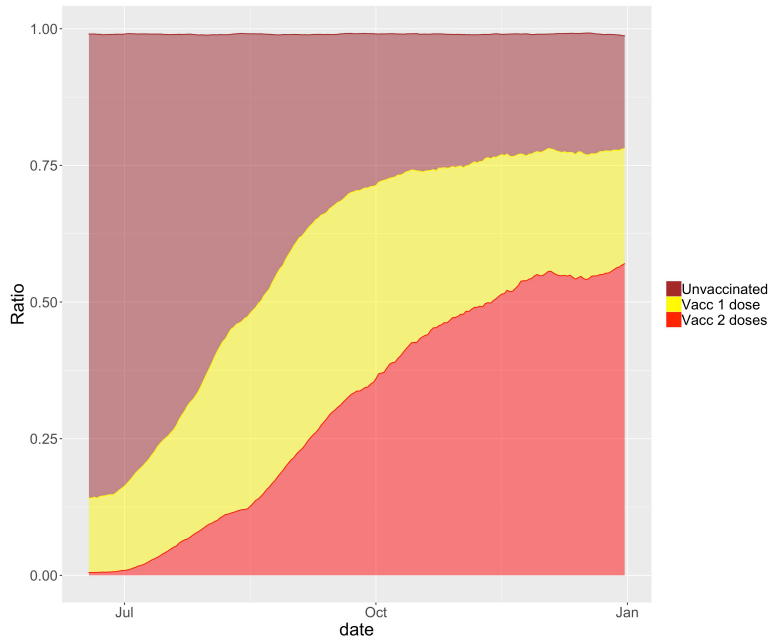

Figure 1: Evolution of the vaccination in South Africa as ratio of the population, estimated from the UMD Global CTIS data. A small fraction of responses that declared being vaccinated without reporting the number of doses are not presented for clarity. The values are from June 18th to December 31st, 2021, smoothed with a rolling average of 14 days.

| Date       | Total doses | Doses   |          | % pop fully vaccinated | % pop 1D |       |       | % pop 2D P/BNT | % pop CTIS |       |
|------------|-------------|---------|----------|------------------------|----------|-------|-------|----------------|------------|-------|
|            |             | J&J     | P/BNT    |                        | J&J      | P/BNT | Sum   |                | 1D         | 2D    |
| 2021/05/18 | 519139      | 479768  | 39371    | 0.81                   | 0.81     | 0.06  | 0.87  | 0.00           | 5.57       | 0.21  |
| 2021/07/08 | 4017442     | 875575  | 3141867  | 2.14                   | 1.49     | 4.07  | 5.56  | 0.64           | 18.14      | 1.99  |
| 2021/07/19 | 5095013     | 969525  | 4125488  | 2.88                   | 1.65     | 4.58  | 6.23  | 1.22           | 21.49      | 5.16  |
| 2021/08/10 | 8811608     | 1903359 | 6908249  | 6.35                   | 3.25     | 5.59  | 8.84  | 3.10           | 33.83      | 11.54 |
| 2021/09/07 | 13892301    | 3077591 | 10814710 | 11.52                  | 5.25     | 5.91  | 11.16 | 6.27           | 38.83      | 25.15 |
| 2021/12/10 | 27043034    | 6631625 | 20411409 | 26.18                  | 11.32    | 5.14  | 16.46 | 14.85          | 22.57      | 54.75 |
| 2022/01/01 | 27966664    | 6848461 | 21118203 | 27.10                  | 11.69    | 5.24  | 16.93 | 15.40          | 21.12      | 57.37 |

Table 1: Vaccine doses per manufacturer and percentage of the population vaccinated with each type in South Africa [36]. A person is fully vaccinated if it received one dose of Johnson&Johnson or two doses of Pfizer/BioNTech. The rightmost columns show the percentage of the UMD CTIS survey responses that declare having received one and two doses of vaccination, respectively. Abbreviations: Johnson&Johnson as J&J and Pfizer/BioNTech as P/BNT.

| Date       | % Delta | % Omicron | # samples |
|------------|---------|-----------|-----------|
| 2021-06-14 | 45.23   | 0.00      | 1101      |
| 2021-06-28 | 78.09   | 0.00      | 1661      |
| 2021-07-12 | 88.90   | 0.00      | 2226      |
| 2021-07-26 | 94.30   | 0.00      | 1667      |
| 2021-08-09 | 95.19   | 0.00      | 1601      |
| 2021-08-23 | 97.58   | 0.00      | 1242      |
| 2021-09-06 | 97.01   | 0.00      | 1269      |
| 2021-09-20 | 95.77   | 0.00      | 923       |
| 2021-10-04 | 93.57   | 0.00      | 513       |
| 2021-10-18 | 93.56   | 0.00      | 450       |
| 2021-11-01 | 95.67   | 0.48      | 208       |
| 2021-11-15 | 69.30   | 20.18     | 114       |
| 2021-11-29 | 13.08   | 85.00     | 780       |
| 2021-12-13 | 0.92    | 95.92     | 980       |
| 2021-12-27 | 0.00    | 93.85     | 65        |

eTable 2: Percentage of sequenced virus samples belonging to Delta and Omicron in South Africa from June 1st to December 31st of 2021. The third column presents the total number of samples reported on the corresponding date.

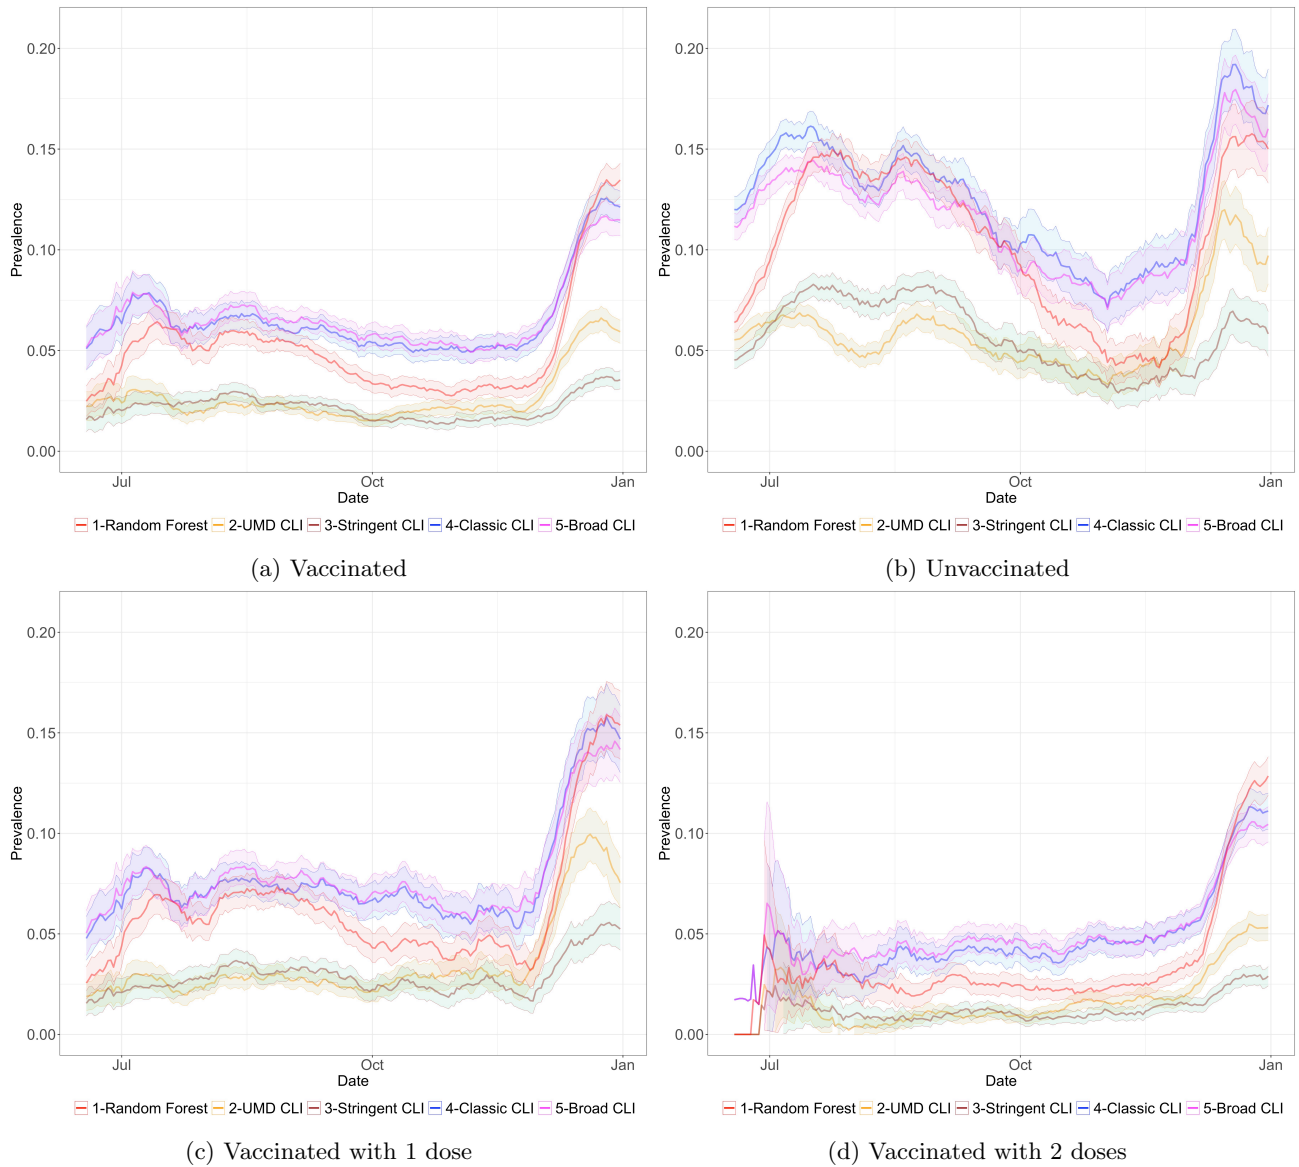

eFigure 2: Prevalence in South Africa among Vaccinated, Unvaccinated, Vaccinated with 1 dose, and Vaccinated with 2 doses, with different proxies.

| Country        | % doses/pop | % pop vacc | % pop fully vacc | % pop booster | Vacc start date |
|----------------|-------------|------------|------------------|---------------|-----------------|
| Argentina      | 167.98      | 83.76      | 71.61            | 12.22         | 2020-12-29      |
| Belgium        | 186.28      | 76.65      | 75.70            | 37.59         | 2020-12-28      |
| Brazil         | 154.81      | 77.66      | 67.03            | 12.42         | 2021-01-17      |
| Colombia       | 126.19      | 74.81      | 55.25            | 6.49          | 2021-02-17      |
| Denmark        | 208.57      | 82.65      | 78.43            | 48.30         | 2021-02-05      |
| France         | 183.78      | 78.61      | 73.48            | 33.28         | 2020-12-27      |
| Germany        | 178.84      | 73.62      | 70.61            | 38.87         | 2020-12-27      |
| India          | 103.98      | 60.69      | 43.29            | 0.00          | 2021-01-16      |
| Italy          | 184.28      | 80.14      | 74.11            | 32.52         | 2020-12-27      |
| Mexico         | 114.24      | 62.89      | 55.87            | 0.00          | 2020-12-24      |
| Netherlands    | 162.18      | 77.54      | 71.18            | 18.50         | 2021-01-09      |
| Norway         | 178.68      | 78.41      | 71.76            | 28.52         | 2020-12-08      |
| Poland         | 124.32      | 57.34      | 55.68            | 18.16         | 2020-12-28      |
| Portugal       | 190.72      | 91.47      | 89.53            | 29.44         | 2020-12-27      |
| Romania        | 82.86       | 28.64      | 40.87            | 0.00          | 2020-12-27      |
| Russia         | 100.31      | 50.60      | 45.76            | 5.06          | 2020-12-15      |
| Slovakia       | 111.09      | 50.13      | 47.61            | 16.33         | 2021-01-11      |
| South Africa   | 46.47       | 31.49      | 26.37            | 0.00          | 2021-02-18      |
| Spain          | 178.69      | 84.85      | 81.01            | 29.40         | 2021-01-04      |
| Sweden         | 172.96      | 76.14      | 72.68            | 0.00          | 2021-01-03      |
| Switzerland    | 158.90      | 68.56      | 66.88            | 24.99         | 2020-12-21      |
| Turkey         | 154.80      | 66.92      | 60.68            | 27.19         | 2021-01-14      |
| United Kingdom | 195.45      | 75.93      | 69.54            | 49.98         | 2021-01-10      |
| Vietnam        | 153.75      | 79.00      | 69.71            | 0.00          | 2021-03-08      |

eTable 3: Information about vaccination on December 31st, 2021, in the countries with presence of Omicron (as defined in Section 2.3.2).

| Country        | Vaccine                                                                         |
|----------------|---------------------------------------------------------------------------------|
| Argentina      | CanSino, Moderna, O/AZ, P/BNT, Sinopharm/Beijing, Sputnik V                     |
| Austria        | J&J, Moderna, O/AZ, P/BNT                                                       |
| Australia      | Moderna, O/AZ, P/BNT                                                            |
| Bangladesh     | Moderna, O/AZ, P/BNT, Sinopharm/Beijing                                         |
| Belgium        | J&J, Moderna, O/AZ, P/BNT                                                       |
| Brazil         | J&J, P/BNT, O/AZ, Sinovac                                                       |
| Bulgaria       | J&J, O/AZ, Moderna, P/BNT                                                       |
| Canada         | J&J, Moderna, O/AZ, P/BNT                                                       |
| Chile          | CanSino, O/AZ, P/BNT, Sinovac                                                   |
| Colombia       | J&J, Moderna, O/AZ, P/BNT, Sinovac                                              |
| Czechia        | J&J, Moderna, O/AZ, P/BNT, Sinovac                                              |
| Denmark        | J&J, Moderna, P/BNT                                                             |
| Ecuador        | CanSino, O/AZ, P/BNT, Sinovac                                                   |
| France         | J&J, Moderna, O/AZ, P/BNT                                                       |
| Germany        | J&J, Moderna, O/AZ, P/BNT                                                       |
| Greece         | J&J, Moderna, O/AZ, P/BNT                                                       |
| Hungary        | J&J, Moderna, O/AZ, P/BNT, Sinopharm/Beijing, Sputnik V                         |
| India          | Covaxin, O/AZ, Sputnik V                                                        |
| Indonesia      | J&J, Moderna, Novavax, O/AZ, P/BNT, Sinopharm/Beijing, Sinovac                  |
| Israel         | Moderna, P/BNT                                                                  |
| Italy          | J&J, Moderna, O/AZ, P/BNT                                                       |
| Japan          | Moderna, O/AZ, P/BNT                                                            |
| Malaysia       | CanSino, O/AZ, P/BNT, Sinopharm/Beijing, Sinovac                                |
| Mexico         | CanSino, J&J, Moderna, O/AZ, P/BNT, Sinovac, Sputnik V                          |
| Netherlands    | J&J, Moderna, O/AZ, P/BNT                                                       |
| New Zealand    | O/AZ, P/BNT                                                                     |
| Nigeria        | O/AZ                                                                            |
| Norway         | Moderna, P/BNT                                                                  |
| Peru           | O/AZ, P/BNT, Sinopharm/Beijing                                                  |
| Philippines    | J&J, Moderna, O/AZ, P/BNT, Sinopharm/Beijing, Sinovac, Sputnik Light, Sputnik V |
| Poland         | J&J, Moderna, O/AZ, P/BNT                                                       |
| Portugal       | Covaxin, J&J, Moderna, Novavax, O/AZ, P/BNT, Sinopharm/Beijing, Sinovac         |
| Romania        | J&J, Moderna, O/AZ, P/BNT                                                       |
| Russia         | Sputnik V, EpiVacCorona                                                         |
| Slovakia       | J&J, Moderna, O/AZ, P/BNT, Sputnik V                                            |
| South Africa   | J&J, P/BNT                                                                      |
| South Korea    | J&J, Moderna, O/AZ, P/BNT                                                       |
| Spain          | J&J, Moderna, O/AZ, P/BNT                                                       |
| Sweden         | Moderna, O/AZ, P/BNT                                                            |
| Switzerland    | J&J, Moderna, P/BNT                                                             |
| Taiwan         | Medigen, Moderna, O/AZ, P/BNT                                                   |
| Thailand       | Moderna, O/AZ, P/BNT, Sinopharm/Beijing, Sinovac                                |
| Turkey         | P/BNT, Sinovac                                                                  |
| Ukraine        | J&J, Moderna, O/AZ, P/BNT, Sinovac                                              |
| United Kingdom | Moderna, O/AZ, P/BNT                                                            |
| Vietnam        | Abdala, Moderna, O/AZ, P/BNT, Sinopharm/Beijing, Sputnik V                      |

eTable 4: Manufacturers of the vaccines delivered in the countries with presence of Omicron by December 31st, 2021 [36]. Abbreviations: Johnson&Johnson as J&J, Oxford/AstraZeneca as O/AZ, and Pfizer/BioNTech as P/BNT.

| Country        | Total Oct | Total Dec | Unvac Oct | Unvac Dec | Vac Oct | Vac Dec | Vac 1D Oct | Vac 1D Dec | Vac 2D Oct | Vac 2D Dec |
|----------------|-----------|-----------|-----------|-----------|---------|---------|------------|------------|------------|------------|
| Argentina      | 44509     | 48807     | 3077      | 2778      | 40276   | 44590   | 3704       | 1884       | 36115      | 41783      |
| Belgium        | 16448     | 18373     | 1687      | 1718      | 14266   | 16004   | 747        | 463        | 13327      | 15269      |
| Brazil         | 198423    | 162402    | 9428      | 6552      | 183859  | 151114  | 38885      | 8680       | 142594     | 139517     |
| Colombia       | 34859     | 33883     | 5437      | 2734      | 28457   | 30197   | 9979       | 7514       | 18034      | 22137      |
| Denmark        | 19591     | 27284     | 917       | 1206      | 18279   | 25472   | 212        | 217        | 17781      | 24684      |
| France         | 82767     | 111041    | 10234     | 11593     | 67393   | 95663   | 6369       | 4708       | 60218      | 89139      |
| Germany        | 89348     | 110359    | 12601     | 11868     | 71980   | 95530   | 6655       | 5490       | 64611      | 88548      |
| India          | 76675     | 68155     | 4076      | 2631      | 63803   | 60076   | 16798      | 7344       | 45967      | 51622      |
| Italy          | 98712     | 112754    | 7023      | 6095      | 89120   | 103305  | 9066       | 5108       | 78852      | 96124      |
| Mexico         | 139967    | 118861    | 12063     | 6472      | 119471  | 109330  | 35960      | 17776      | 82321      | 90162      |
| Netherlands    | 27505     | 30803     | 3804      | 3380      | 23001   | 26621   | 2175       | 2025       | 20397      | 24087      |
| Norway         | 16746     | 21862     | 935       | 1010      | 15536   | 20404   | 389        | 304        | 14980      | 19724      |
| Poland         | 30295     | 38001     | 5318      | 6105      | 23924   | 30578   | 2327       | 2499       | 21236      | 27603      |
| Portugal       | 22758     | 29352     | 1299      | 1368      | 21017   | 27340   | 3470       | 3172       | 17180      | 23631      |
| Romania        | 45123     | 24638     | 11038     | 4917      | 32558   | 19022   | 4477       | 2451       | 27594      | 16192      |
| Russia         | 35186     | 30037     | 12301     | 9001      | 21680   | 19884   | 2845       | 2819       | 18573      | 16779      |
| Slovakia       | 9567      | 11323     | 1987      | 2208      | 7382    | 8841    | 306        | 487        | 6989       | 8215       |
| South Africa   | 18308     | 19492     | 4149      | 4006      | 12805   | 14753   | 5009       | 4138       | 7624       | 10423      |
| Spain          | 33455     | 51568     | 2035      | 2625      | 30652   | 47444   | 3814       | 3574       | 26453      | 43223      |
| Sweden         | 53564     | 57823     | 3001      | 3200      | 49564   | 53544   | 699        | 443        | 48380      | 52348      |
| Switzerland    | 14863     | 16755     | 2906      | 2617      | 11585   | 13742   | 886        | 676        | 10541      | 12824      |
| Turkey         | 27159     | 22854     | 3238      | 2307      | 23033   | 19844   | 1473       | 729        | 21015      | 18561      |
| United Kingdom | 41812     | 47072     | 3080      | 3174      | 37421   | 42421   | 925        | 770        | 36109      | 41122      |
| Vietnam        | 48955     | 39105     | 8043      | 1116      | 37073   | 36097   | 17325      | 3241       | 19233      | 32246      |

eTable 5: Number of survey responses used in each period from the countries with presence of Omicron (as defined in Section 2.3.2), for each level of vaccination.

| Country        | Pos Oct | Pos Dec | Unvac Oct | Unvac Dec | Vac Oct | Vac Dec | Vac 1D Oct | Vac 1D Dec | Vac 2D Oct | Vac 2D Dec |
|----------------|---------|---------|-----------|-----------|---------|---------|------------|------------|------------|------------|
| Argentina      | 715     | 1302    | 87        | 99        | 594     | 1143    | 102        | 90         | 484        | 1034       |
| Belgium        | 364     | 912     | 69        | 130       | 274     | 751     | 25         | 31         | 248        | 713        |
| Brazil         | 5111    | 4066    | 405       | 224       | 4486    | 3648    | 1334       | 355        | 3072       | 3194       |
| Colombia       | 1013    | 1103    | 285       | 158       | 666     | 897     | 291        | 280        | 364        | 596        |
| Denmark        | 232     | 1405    | 24        | 116       | 196     | 1256    | 5          | 16         | 186        | 1228       |
| France         | 703     | 3452    | 149       | 596       | 486     | 2733    | 102        | 130        | 377        | 2566       |
| Germany        | 619     | 2253    | 155       | 580       | 428     | 1616    | 52         | 149        | 373        | 1453       |
| India          | 2899    | 2231    | 186       | 93        | 1629    | 1235    | 623        | 242        | 958        | 939        |
| Italy          | 558     | 2610    | 120       | 329       | 394     | 2158    | 67         | 95         | 322        | 2035       |
| Mexico         | 6881    | 4747    | 1201      | 485       | 5167    | 4047    | 2287       | 1038       | 2808       | 2956       |
| Netherlands    | 487     | 1441    | 95        | 210       | 367     | 1179    | 60         | 106        | 299        | 1046       |
| Norway         | 147     | 569     | 15        | 39        | 127     | 516     | 10         | 17         | 116        | 495        |
| Poland         | 1039    | 2504    | 298       | 749       | 676     | 1614    | 90         | 173        | 572        | 1416       |
| Portugal       | 170     | 821     | 17        | 55        | 142     | 742     | 28         | 98         | 112        | 632        |
| Romania        | 2579    | 448     | 1109      | 175       | 1335    | 239     | 158        | 42         | 1158       | 186        |
| Russia         | 1550    | 775     | 752       | 318       | 727     | 401     | 79         | 70         | 633        | 323        |
| Slovakia       | 276     | 635     | 89        | 216       | 174     | 397     | 14         | 36         | 157        | 360        |
| South Africa   | 695     | 2348    | 249       | 599       | 388     | 1672    | 214        | 564        | 167        | 1093       |
| Spain          | 468     | 2776    | 65        | 186       | 375     | 2479    | 80         | 177        | 290        | 2277       |
| Sweden         | 297     | 1037    | 48        | 103       | 234     | 899     | 8          | 16         | 225        | 878        |
| Switzerland    | 170     | 639     | 61        | 175       | 102     | 445     | 10         | 21         | 90         | 418        |
| Turkey         | 1479    | 1143    | 288       | 181       | 1125    | 897     | 136        | 57         | 962        | 818        |
| United Kingdom | 1321    | 2168    | 141       | 180       | 1124    | 1926    | 53         | 59         | 1060       | 1851       |
| Vietnam        | 364     | 1271    | 58        | 35        | 251     | 1141    | 95         | 76         | 152        | 1043       |

eTable 6: Number of survey responses classified as positive by Random Forest in each period from the countries with presence of Omicron (as defined in Section 2.3.2), for each level of vaccination.



| Vaccination status | Prevalence       |                  | Vaccination efficacy |                  |
|--------------------|------------------|------------------|----------------------|------------------|
|                    | October          | December         | October              | December         |
| Vaccinated 2 doses | 0.02 [0.01,0.02] | 0.03 [0.03,0.04] | 0.53 [0.49,0.58]     | 0.45 [0.39,0.50] |
| Vaccinated         | 0.02 [0.01,0.03] | 0.04 [0.03,0.04] | 0.49 [0.45,0.52]     | 0.43 [0.37,0.48] |
| Vaccinated 1 dose  | 0.03 [0.02,0.04] | 0.05 [0.04,0.06] | 0.34 [0.22,0.45]     | 0.32 [0.23,0.41] |
| Unvaccinated       | 0.04 [0.03,0.05] | 0.06 [0.05,0.07] | –                    | –                |

eTable 7: Prevalence of COVID-19 and vaccine efficacy (with 95% confidence interval) in the countries with presence of Omicron in the periods of October and December 2021.

| Prevalence omicron vs  | Correlation coefficient | P-value  |
|------------------------|-------------------------|----------|
| Vaccination efficacy   | -0.680301               | 0.000354 |
| Vacc. efficacy 1 dose  | -0.564977               | 0.035274 |
| Vacc. efficacy 2 doses | -0.628936               | 0.001306 |

eTable 8: Correlation between prevalence of Omicron and vaccine efficacy in the countries with presence of Omicron.

| Country      | Quarter | Classifier    | Accuracy    | Sensitivity | Specificity | F-score     |
|--------------|---------|---------------|-------------|-------------|-------------|-------------|
| Argentina    | 2021-Q3 | Random Forest | <b>0.85</b> | 0.80        | <b>0.86</b> | <b>0.61</b> |
|              |         | UMD CLI       | 0.78        | 0.74        | 0.79        | 0.25        |
|              |         | Stringent CLI | 0.82        | <b>0.85</b> | 0.82        | 0.44        |
|              |         | Classic CLI   | 0.81        | 0.67        | 0.83        | 0.48        |
|              |         | Broad CLI     | 0.80        | 0.64        | 0.82        | 0.45        |
| Japan        | 2021-Q3 | Random Forest | <b>0.95</b> | <b>0.81</b> | <b>0.96</b> | <b>0.51</b> |
|              |         | UMD CLI       | 0.94        | 0.58        | 0.95        | 0.36        |
|              |         | Stringent CLI | <b>0.95</b> | 0.77        | 0.95        | 0.39        |
|              |         | Classic CLI   | 0.93        | 0.44        | <b>0.96</b> | 0.42        |
|              |         | Broad CLI     | 0.91        | 0.29        | 0.95        | 0.29        |
| South Africa | 2021-Q3 | Random Forest | <b>0.83</b> | 0.81        | <b>0.83</b> | <b>0.71</b> |
|              |         | UMD CLI       | 0.71        | 0.70        | 0.72        | 0.34        |
|              |         | Stringent CLI | 0.79        | <b>0.87</b> | 0.77        | 0.57        |
|              |         | Classic CLI   | 0.77        | 0.71        | 0.80        | 0.61        |
|              |         | Broad CLI     | 0.76        | 0.70        | 0.78        | 0.57        |
| Argentina    | 2021-Q4 | Random Forest | <b>0.90</b> | <b>0.71</b> | <b>0.91</b> | <b>0.51</b> |
|              |         | UMD CLI       | 0.88        | 0.63        | 0.89        | 0.35        |
|              |         | Stringent CLI | 0.88        | 0.70        | 0.89        | 0.37        |
|              |         | Classic CLI   | 0.86        | 0.48        | <b>0.91</b> | 0.44        |
|              |         | Broad CLI     | 0.86        | 0.47        | 0.90        | 0.42        |
| Japan        | 2021-Q4 | Random Forest | <b>0.97</b> | <b>0.69</b> | <b>0.97</b> | <b>0.31</b> |
|              |         | UMD CLI       | 0.96        | 0.26        | <b>0.97</b> | 0.20        |
|              |         | Stringent CLI | <b>0.97</b> | 0.59        | <b>0.97</b> | 0.30        |
|              |         | Classic CLI   | 0.94        | 0.18        | <b>0.97</b> | 0.22        |
|              |         | Broad CLI     | 0.93        | 0.11        | <b>0.97</b> | 0.14        |
| South Africa | 2021-Q4 | Random Forest | <b>0.83</b> | 0.69        | <b>0.85</b> | <b>0.55</b> |
|              |         | UMD CLI       | 0.79        | 0.63        | 0.81        | 0.35        |
|              |         | Stringent CLI | 0.80        | <b>0.74</b> | 0.80        | 0.32        |
|              |         | Classic CLI   | 0.80        | 0.58        | 0.84        | 0.48        |
|              |         | Broad CLI     | 0.80        | 0.58        | 0.84        | 0.47        |

eTable 9: Performance for three different countries in two different 3-month periods (2021-Q3: July-September 2021 and 2021-Q4: October-December 2021) of the different classifiers in the ground-truth set, when randomly divided into training (70%) and testing (30%) subsets.

| Country        | Pearson correlation with Confirmed |             |                  |             |                  |                |              |
|----------------|------------------------------------|-------------|------------------|-------------|------------------|----------------|--------------|
|                | OWID<br>TPR                        | CTIS<br>TPR | Random<br>Forest | UMD<br>CLI  | Stringent<br>CLI | Classic<br>CLI | Broad<br>CLI |
| Argentina      | <b>0.09</b>                        | 0.17        | <b>0.95</b>      | <b>0.97</b> | <b>0.96</b>      | <b>0.92</b>    | <b>0.91</b>  |
| Australia      | <b>0.01</b>                        | <b>0.02</b> | <b>0.93</b>      | 0.46        | 0.31             | -0.10          | 0.03         |
| Brazil         | –                                  | 0.19        | <b>0.98</b>      | 0.03        | 0.82             | 0.36           | 0.46         |
| Canada         | <b>0.03</b>                        | <b>0.04</b> | <b>0.94</b>      | 0.85        | 0.66             | 0.73           | 0.71         |
| France         | <b>0.03</b>                        | <b>0.05</b> | <b>0.92</b>      | 0.69        | 0.80             | 0.57           | 0.61         |
| Germany        | <b>0.09</b>                        | <b>0.01</b> | <b>0.96</b>      | 0.88        | <b>0.91</b>      | 0.82           | 0.81         |
| Hungary        | <b>0.08</b>                        | 0.16        | <b>0.93</b>      | 0.85        | <b>0.95</b>      | 0.82           | 0.79         |
| India          | <b>0.02</b>                        | 0.16        | 0.31             | -0.38       | -0.31            | -0.71          | -0.37        |
| Italy          | <b>0.02</b>                        | <b>0.03</b> | <b>0.98</b>      | 0.86        | 0.85             | 0.71           | 0.72         |
| Japan          | <b>0.05</b>                        | <b>0.04</b> | <b>0.93</b>      | <b>0.90</b> | 0.84             | -0.17          | 0.67         |
| Mexico         | 0.27                               | 0.22        | <b>0.97</b>      | <b>0.99</b> | <b>0.98</b>      | <b>0.95</b>    | <b>0.98</b>  |
| Poland         | <b>0.08</b>                        | 0.16        | <b>0.96</b>      | 0.82        | <b>0.97</b>      | 0.80           | 0.80         |
| Romania        | <b>0.07</b>                        | <b>0.09</b> | <b>0.94</b>      | <b>0.96</b> | <b>0.98</b>      | <b>0.96</b>    | <b>0.95</b>  |
| Russia         | <b>0.05</b>                        | 0.14        | 0.38             | 0.34        | 0.37             | 0.41           | 0.33         |
| South Africa   | 0.16                               | 0.24        | <b>0.93</b>      | <b>0.92</b> | 0.84             | <b>0.97</b>    | <b>0.98</b>  |
| Spain          | <b>0.07</b>                        | <b>0.09</b> | <b>0.93</b>      | 0.82        | 0.79             | 0.48           | 0.52         |
| Sweden         | <b>0.06</b>                        | <b>0.05</b> | <b>0.91</b>      | 0.83        | 0.74             | 0.71           | 0.67         |
| Thailand       | 0.20                               | <b>0.07</b> | 0.85             | 0.83        | <b>0.92</b>      | 0.84           | 0.77         |
| Ukraine        | 0.20                               | 0.16        | <b>0.97</b>      | 0.87        | <b>0.95</b>      | <b>0.91</b>    | 0.89         |
| United Kingdom | <b>0.04</b>                        | <b>0.06</b> | 0.84             | 0.70        | 0.52             | 0.59           | 0.60         |
| Vietnam        | <b>0.06</b>                        | <b>0.02</b> | 0.83             | 0.79        | 0.79             | 0.74           | 0.78         |

eTable 10: Test-positivity rate (TPR) obtained from OWID and extracted from the UMD Global CTIS data for the 20 countries with largest survey data and South Africa. Values of at most 0.1 are shown in bold. The rest of columns show the Pearson correlation coefficient of each different proxy with the Confirmed time series. Correlation values of at least 0.9 are shown in bold. The time period used is Jun 18th, 2021 to Dec 31st, 2021. The estimates have been smoothed with a rolling average of 14 days.

| Script name                        | Description                                                                                                  |
|------------------------------------|--------------------------------------------------------------------------------------------------------------|
| run.pipeline.sh                    | Processes the CTIS microdata to generate estimates aggregated daily.                                         |
| dates2microdata.R                  | Separate the CTIS microdata (responses) into files by date and country.                                      |
| microdata2total.R                  | Aggregate the responses of each country by quarter in different files.                                       |
| total2dummies.R                    | Remove abnormal responses and “dummify” of the data columns (see Section B.2).                               |
| model_rf_generation.R              | Train a random forest model as described in Section B.2.                                                     |
| model_rf_symp_generation.R         | Train a random forest model but only for symptomatic responses.                                              |
| model_Xgboost_generation.R         | Train an Xgboost model.                                                                                      |
| model_Xgboost_symp_generation.R    | Train an Xgboost model but only for symptomatic responses.                                                   |
| dummies2aggregates.R               | Compute estimates of active cases using symptoms combinations and ML models, and aggregate the data per day. |
| run.sh                             | Processes the aggregated CTIS estimates to produce the tables and plots for this paper.                      |
| script-variants-monthly.R          | Computation of Omicron presence since December 15th, 2021.                                                   |
| script-TPR.R                       | Generation of data for eTable 10.                                                                            |
| script-country-plots-data-create.R | Generation of data for ZA plots.                                                                             |
| script-country-plots.R             | Generation of ZA plots.                                                                                      |
| script-vaccination-plot-ZA.R       | Generation of the vaccination plots for ZA.                                                                  |
| script-efficacy-ZA.R               | Generation of efficacy tables for ZA.                                                                        |
| script-efficacy-ZA-Gauteng.R       | Generation of efficacy tables for Gauteng.                                                                   |
| script-efficacy-data-create.R      | Generation of efficacy data for world countries.                                                             |
| script-efficacy-plots.R            | Generation of efficacy plots for world countries.                                                            |
| script-efficacy-tables.R           | Generation of efficacy tables for world countries.                                                           |

eTable 11: Scripts used to process the data in this study. run\_pipeline.sh invokes a series of R scripts as presented to transform the CTIS microdata into estimates of active cases aggregated per day. run.sh invokes R scripts to process the aggregated estimates and other data to produce the tables and figures presented in the paper.
